# Supplementary material
Source: PubMed Central journal article supplement (PMC5134426)

Wong et al Supplementary Fig.1

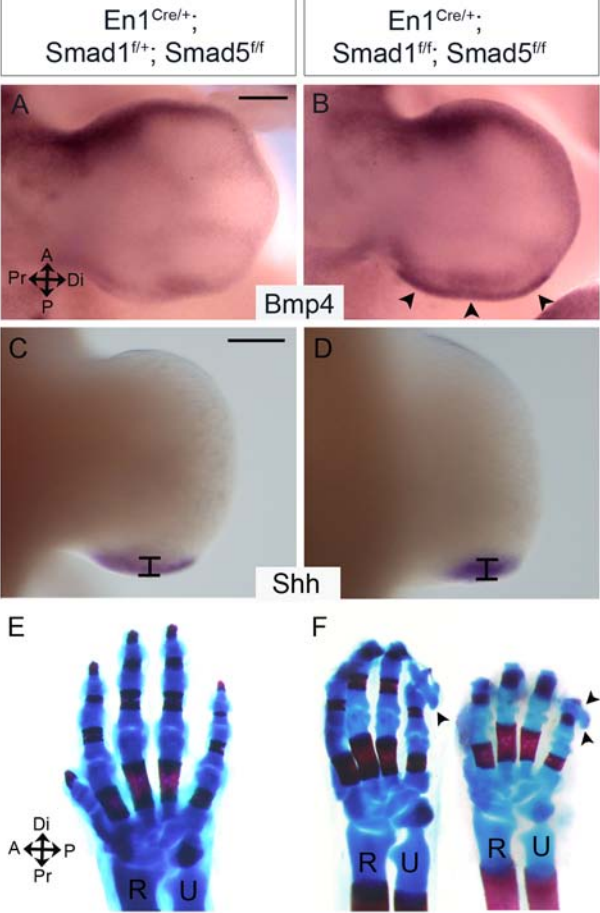

Supplement: NIHMS828711-supplement-Suppl_Fig__1.pdf [file NIHMS828711-supplement-Suppl_Fig__1.pdf]
